# Supplementary material for: 3D-printed carbon nanoparticle monoliths enabling ultrahigh mass loading of NiCoAl layered double hydroxides for asymmetric supercapacitors
Source: Royal Society of Chemistry journal article supplement (doi:10.1039/d5nr03834k), 2026-01-01
Supplement: d5nr03834k1.pdf [file d5nr03834k1.pdf]

## Supporting information

### **3D-Printed Carbon Nanoparticle Monoliths Enabling Ultrahigh Mass Loading of NiCoAl Layered Double Hydroxides for Asymmetric Supercapacitors**

*Jungeun Bae, Thang Cao Doan, Anisa Fitriani Rosyadi, Yebin Park, and Hyojong Yoo\**

Department of Battery and Chemical Engineering, Hanyang University, Ansan, Gyeonggi-do,  
15588, Republic of Korea

\*Correspondence to: [hjhaha73@hanyang.ac.kr](mailto:hjhaha73@hanyang.ac.kr)

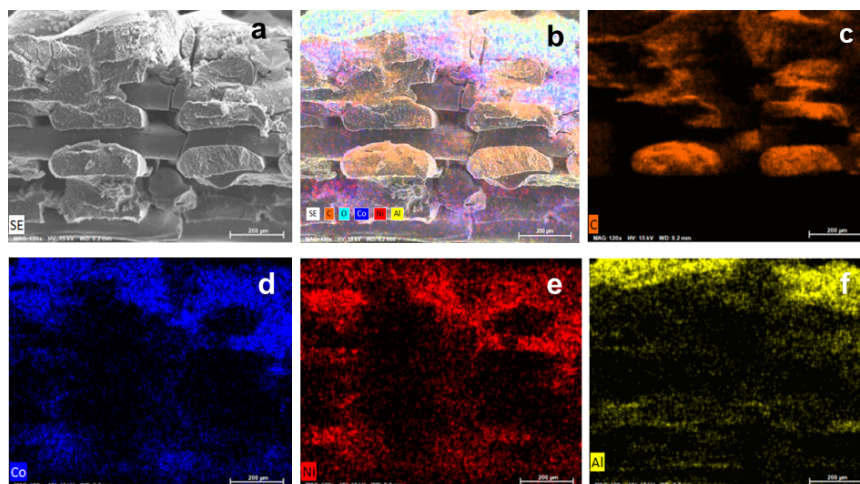

Figure S1: a) SEM image of cross-sectional NiCoAl-2-LDH@3D-PE; Elemental mapping for b) overall, c) C, d) Co, e) Ni, and f) Al.

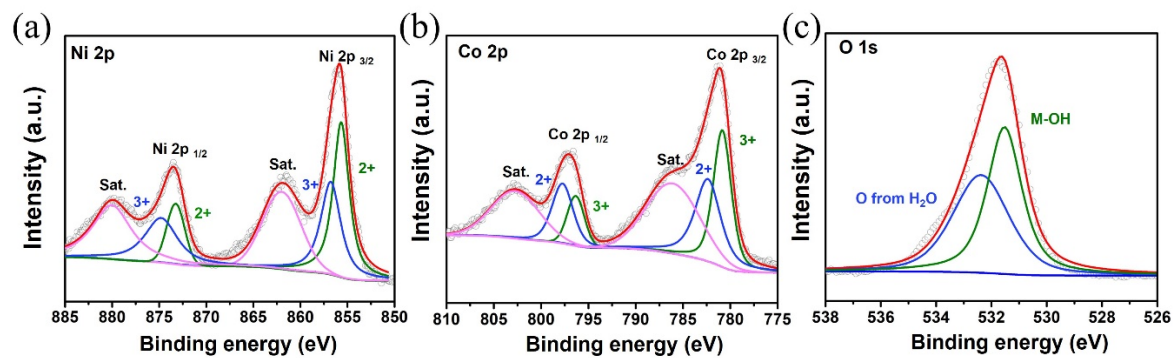

**Fig. S2:** The high-resolution XPS spectra of Ni 2p (a), Co 2p (b), and O 1s (c) for NiCo-LDH@3D-PE.

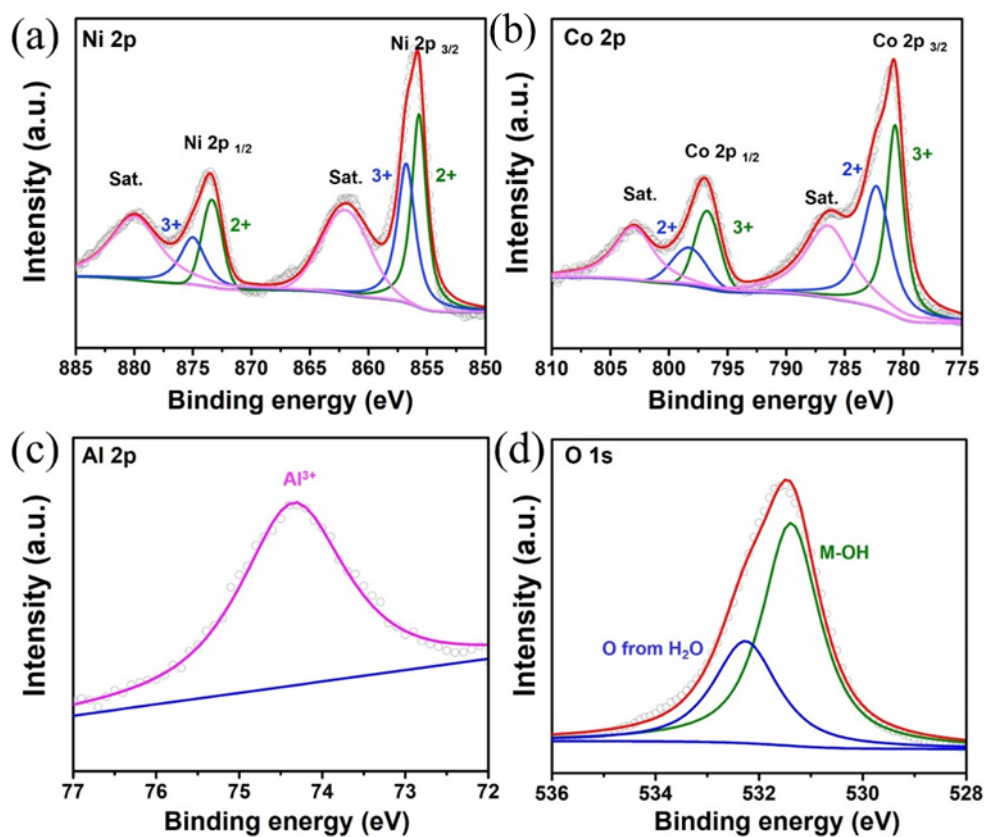

**Fig. S3:** The high-resolution XPS spectra of Ni 2p (a), Co 2p (b), Al 2p (c), and O 1s (d) for NiCoAl-LDH-5@3D-PE.

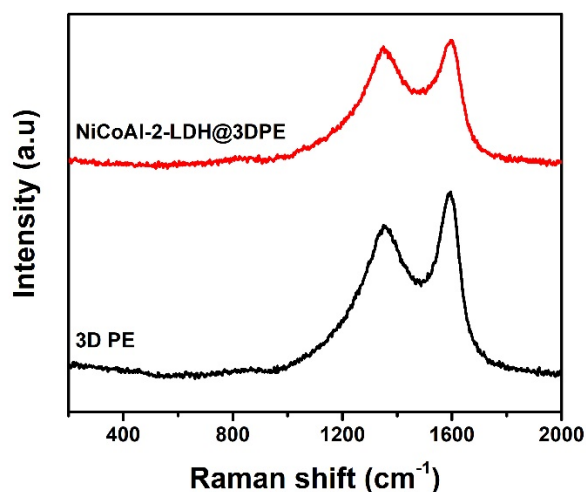

**Fig. S4:** Raman spectra of 3D-PE and NiCoAl-2-LDH@3D-PE

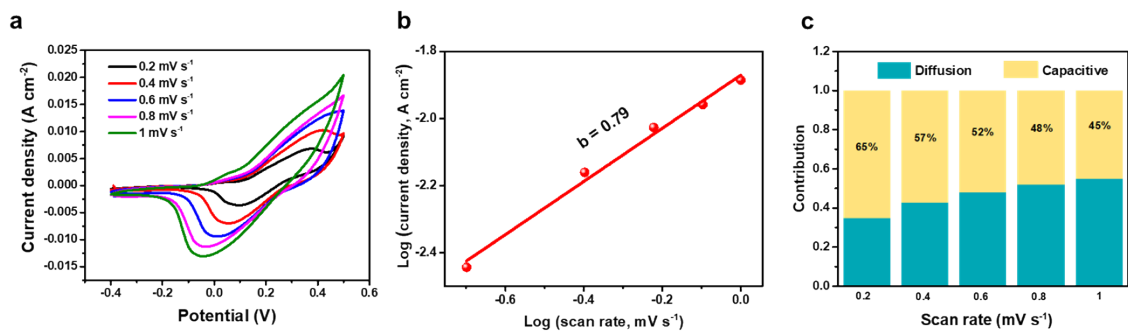

Fig. S5: a) CV curves response for NiCoAl-2-LDH@3D-PE at different scan rates. b) Calibration plot for log ( $v/\text{mV s}^{-1}$ ) vs. log ( $i_p/\text{A cm}^{-2}$ ). c) Bar graph for contribution percentage between capacitive and diffusion-limited capacitances at different scan rates.

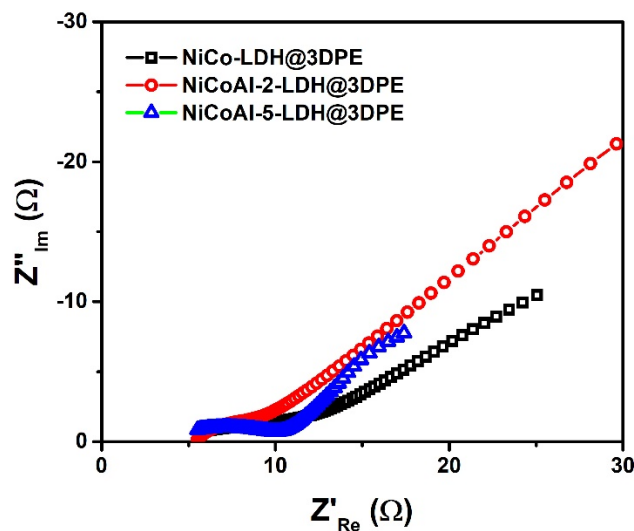

Fig. S6: Nyquist plots of NiCo-LDH@3D-PE, NiCoAl-2-LDH@3D-PE, NiCoAl-5-LDH@3D-PE

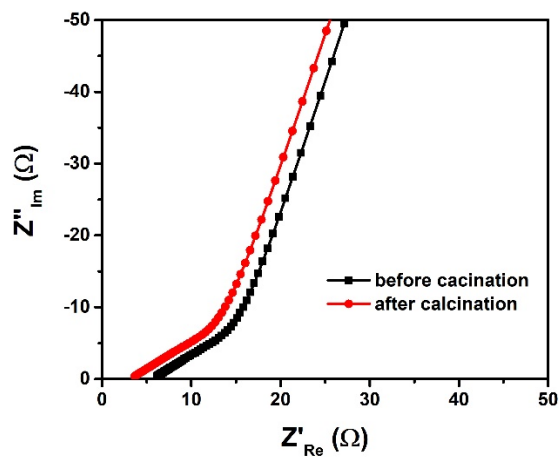

Fig. S7: Nyquist plot of 3D printed electrode before and after calcination.

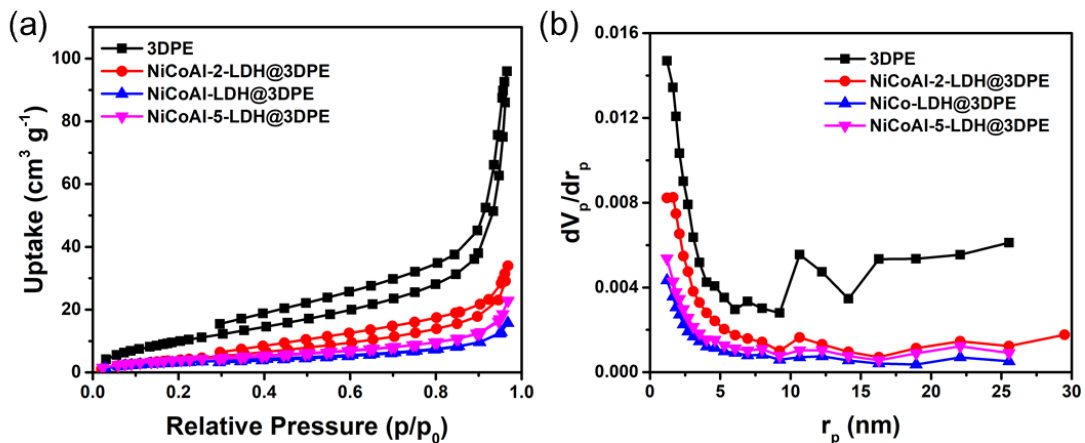

Fig. S8: a)  $N_2$  adsorption isotherms and b) BJH curves of 3D-PE, NiCo-LDH@3D-PE, NiCoAl-2-LDH@3D-PE, and NiCoAl-5-LDH@3D-PE.”

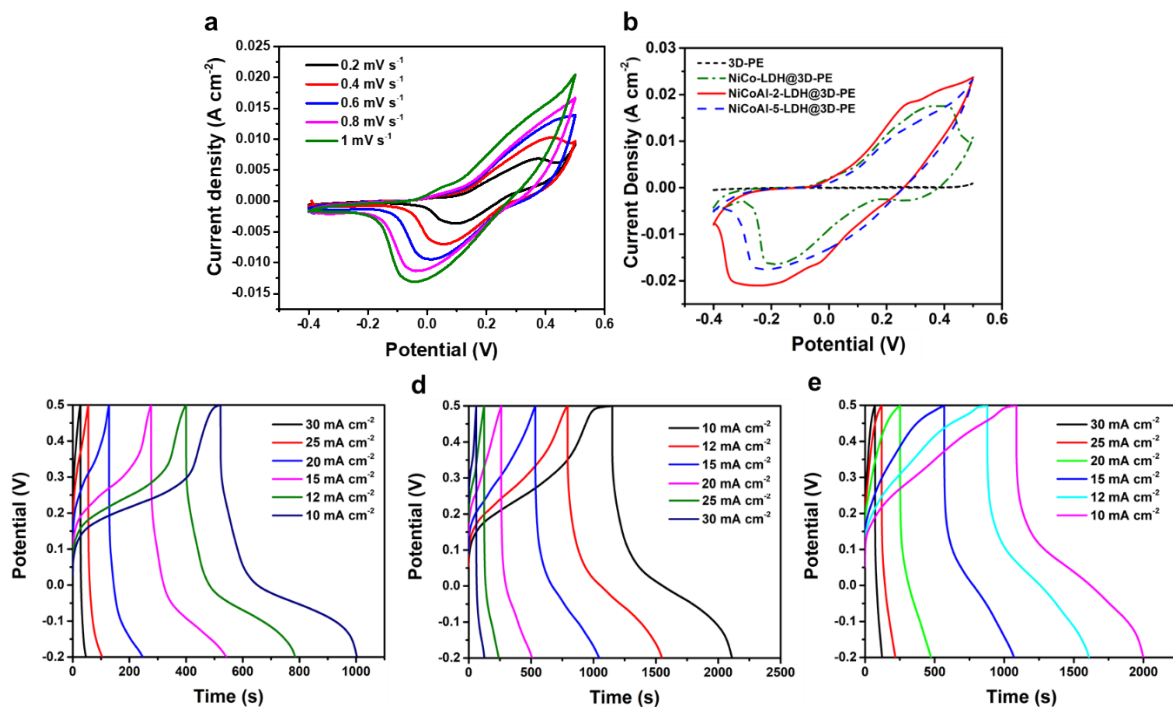

Fig. S9: a) CV curves of NiCoAl-2-LDH@3D-PE with different scan rate, b) CV curves of 3D-PE, NiCo-LDH@3D-PE, NiCoAl-2-LDH@3D-PE, and NiCoAl-5-LDH@3D-PE. GCD curves with different current density of c) NiCo-LDH@3D-PE, d) NiCoAl-2-LDH@3D-PE, e) NiCoAl-5-LDH@3D-PE.

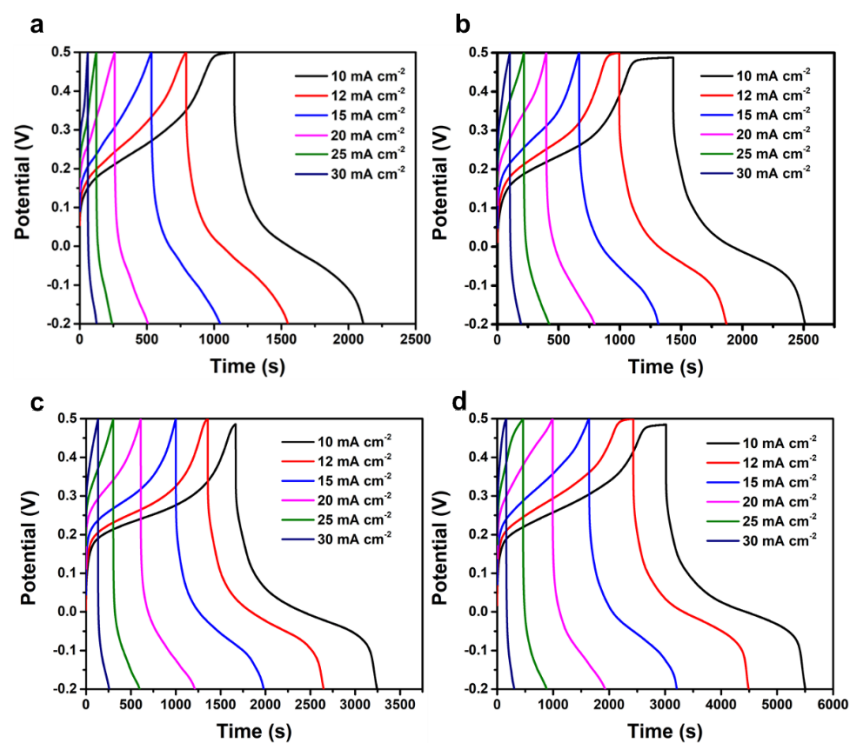

Fig. S10: GCD curves at different current densities of NiCoAl-2-LDH@3D-PE with the thickness of a) 0.8 mm, b) 1.6 mm, c) 2.4 mm, and d) 3.2 mm

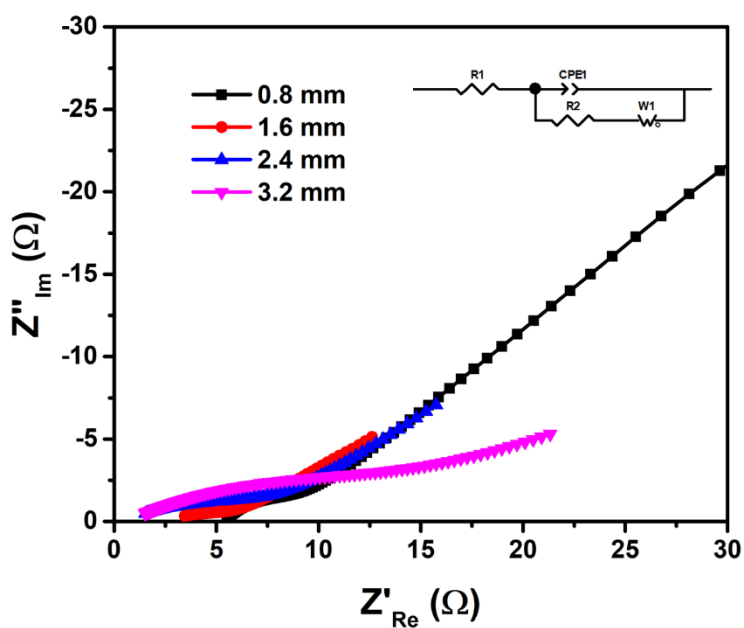

Fig. S11: Nyquist plots of NiCoAl-LDH-2@3D-PE with different electrode thickness

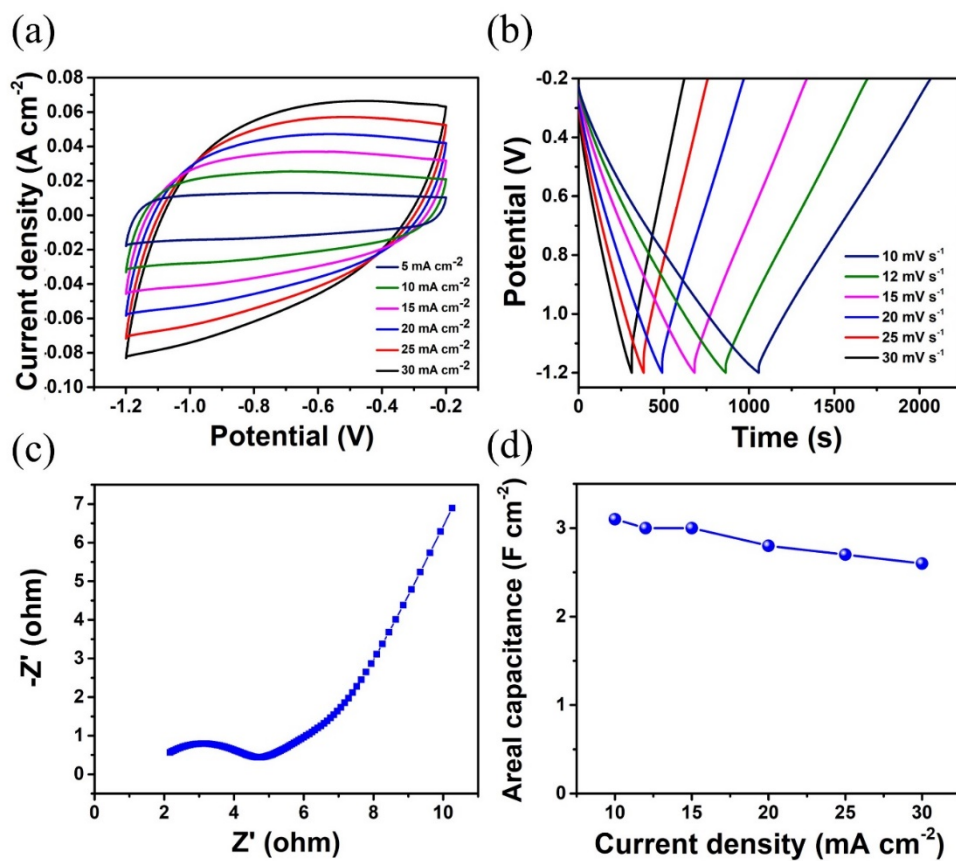

**Fig. S12:** Electrochemical performance of ATCC: (a, b) CV and GCD curves at different scan rate and different current densities. (c) Nyquist plot for ATCC. (d) Areal capacitance for different current densities.

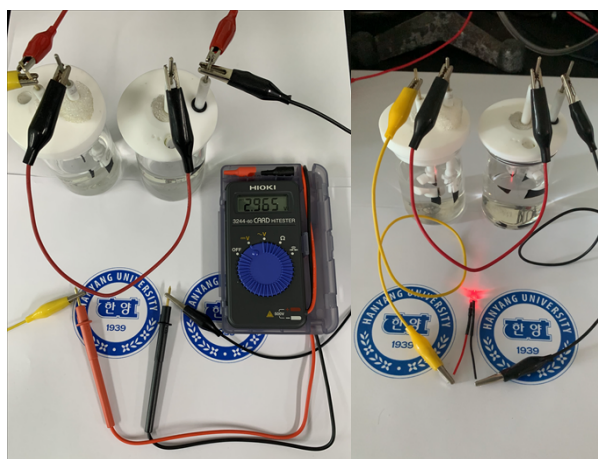

**Fig. S13:** digital images of 2 asymmetric supercapacitor devices NiCoAl-2-LDH@3D-PE//ATCC

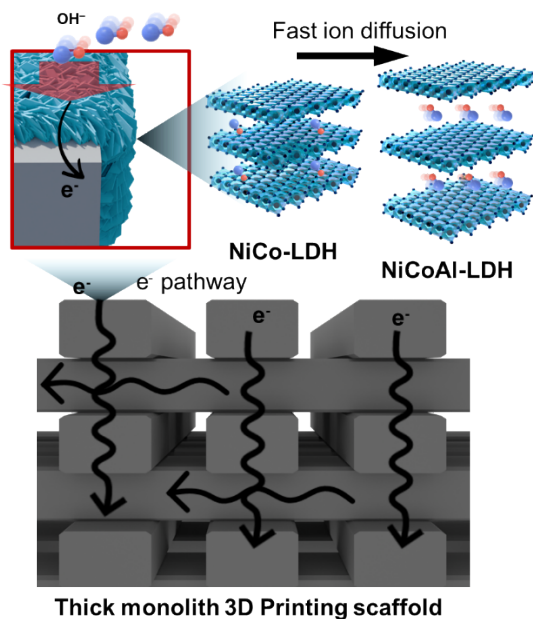

Fig. S14: schematic illustration of ion and electron transport pathways within the 3D-PE structure

**Table S1:** BET surface area, pore volume and mean pore diameter of 3D-PE and NiCoAl-2-LDH@3D-PE.

| Samples            | BET surface area<br>(m <sup>2</sup> g <sup>-1</sup> ) | Pore volume<br>(cm <sup>3</sup> g <sup>-1</sup> ) | Mean pore diameter<br>(nm) |
|--------------------|-------------------------------------------------------|---------------------------------------------------|----------------------------|
| 3D-PE              | 41.03                                                 | 0.15                                              | 14.46                      |
| NiCo-LDH@3D-PE     | 12.46                                                 | 0.02                                              | 7.80                       |
| NiCoAl-2-LDH@3D-PE | 18.67                                                 | 0.05                                              | 11.26                      |
| NiCoAl-5-LDH@3D-PE | 15.48                                                 | 0.04                                              | 9.12                       |

Table S2:  $R_{\text{esr}}$  and  $R_{\text{ct}}$  of NiCoAl-LDH-2@3D-PE with different electrode thickness

| Electrode thickness | $R_{\text{esr}}$ | $R_{\text{ct}}$ |
|---------------------|------------------|-----------------|
| 0.8 mm              | 5.40             | 3.96            |
| 1.6 mm              | 2.37             | 5.06            |
| 2.4 mm              | 0.57             | 6.25            |
| 3.2 mm              | 0.56             | 8.74            |
